# Supplementary material for: Identification of bipotent progenitors that give rise to myogenic and connective tissues in mouse
Source: eLife journal article supplement (doi:10.7554/elife.70235), 2022-02-28

Mesp1<sup>Cre/+</sup>;R26<sup>mTmG/+</sup> E10.5

A

Brown adipocytes

Pericytes

Cartilage

Endothelial

Mesenchyme

Ebf2

Lum

Sox9

Igfbp7

Msx1

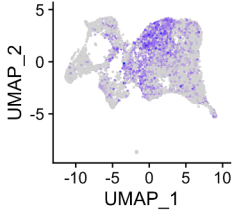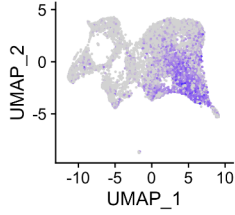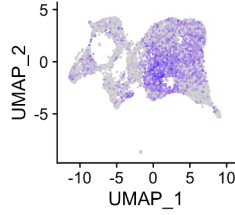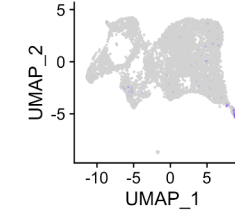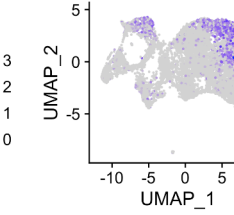

Mesenchyme

Mesenchyme

Sclerotome

Myogenic progenitors

Myogenic committed

Prrx1

Meis1

Pax1

Myf5

Myod1

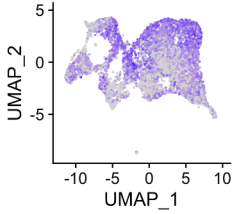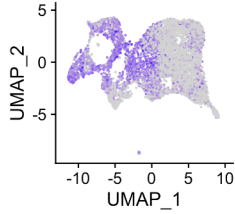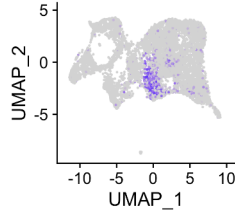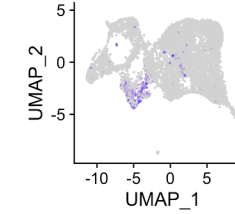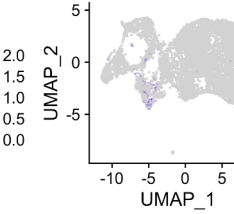

Lung/foregut

Posterior CPM

Myocardium

Pericardium

Posterior lateral CPM

Wnt4

Hoxb4

Nkx2-5

Tbx3

Shox2

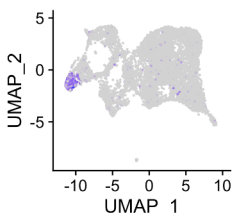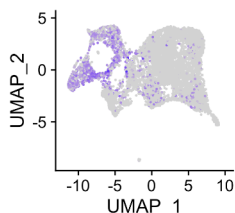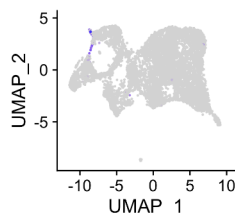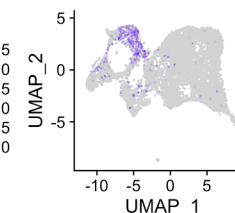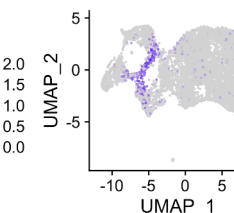

B

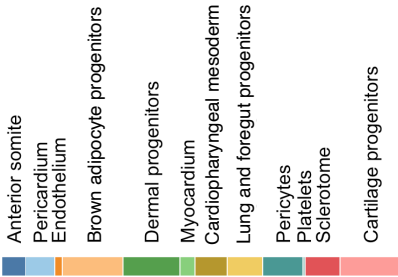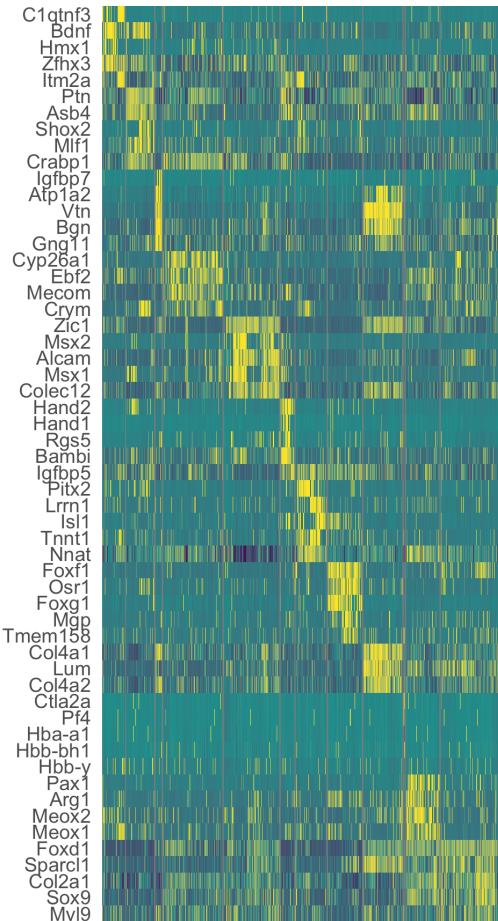

Expression

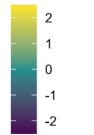

C

Lbx1

En1

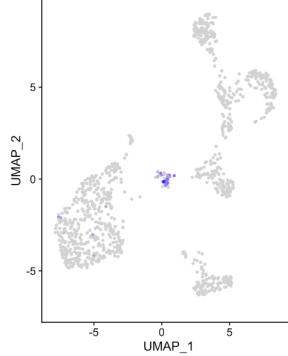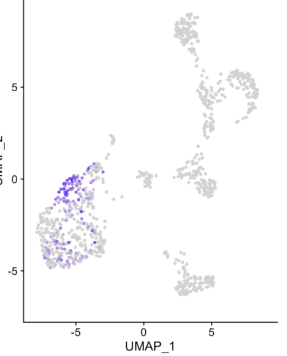

Pitx2

Isl1

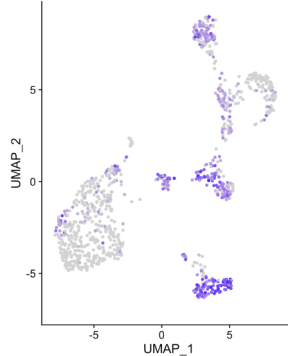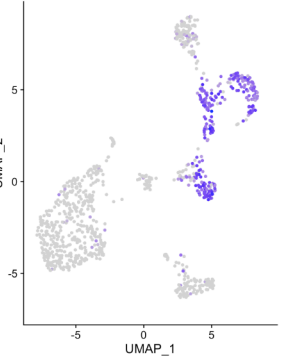

En2

Shox2

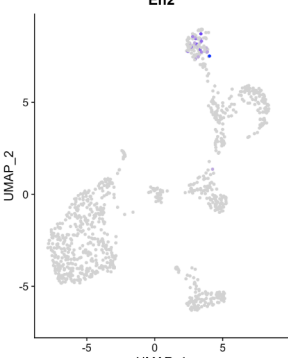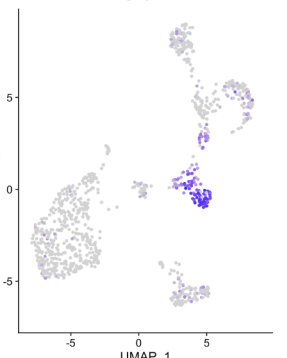

Supplement: supp [file elife_poa_e70235_Figure_1_figure_supplement_2.pdf › elife_poa_e70235_Figure_1_figure_supplement_2.pdf]
