# Supplementary material for: Identification of bipotent progenitors that give rise to myogenic and connective tissues in mouse
Source: eLife. 2022 Feb 28;11:e70235. doi: 10.7554/eLife.70235 (PMC9020825; doi:10.7554/eLife.70235)
Supplement: Figure 3—source data 1. [file elife-70235-fig3-data1.xlsx]

## Sheet: Panel J
Quantification of GFP+TOM+ cells / GFP+ cells
Immunostaining on Myf5Cre:R26tdTom:PDGFRA-H2BGFP E14.5 embryos
	Region1: midline attachment			Region 2: medial muscle mass			Region 3: intraconal fat			Region 4: lateral muscle mass
Embryo number	n* cells GFP+	n* GFP+ Tom+	% Tom+/GFP+	n* cells GFP+	n* GFP+ Tom+	% Tom+/GFP+	n* cells GFP+	n* GFP+ Tom+	% Tom+/GFP+	n* cells GFP+	n* GFP+ Tom+	% Tom+/GFP+
Embryo1	150	63	42	504	147	29.1667	591	115	19.4585	221	5	2.26244
	161	39	24.2236	238	14	5.88235				202	1	0.49505
				246	24	9.7561				138	3	2.17391
Embryo2	84	22	26.1905	344	73	21.2209				207	1	0.483092
				123	1	0.813008				117	1	0.854701
										87	0	0
										80	3	3.75
Embryo3	81	15	18.5185	339	88	25.9587	394	89	22.5888	331	2	0.60423
	145	53	36.5517	227	27	11.8943	147	28	19.0476	146	6	4.10959
				65	8	12.3077				107	0	0
										142	1	0.704225
