# Supplementary material for: Identification of bipotent progenitors that give rise to myogenic and connective tissues in mouse
Source: eLife. 2022 Feb 28;11:e70235. doi: 10.7554/eLife.70235 (PMC9020825; doi:10.7554/eLife.70235)
Supplement: Figure 4—source data 1. [file elife-70235-fig4-data1.xlsx]

## Sheet: Feuil1 (2)
L/R	embryo	Region	Filepath	Ligand or Receptor	Probe	ROI	Value		L/R	embryo	Region	Filepath	Probe	Ratio			Probe	embryo	Ratio Myo/Nonmyo ratios		Ratios L/R	embryo	Ratio Ligand(Myo/Nonmyo)/Receptor(Myo/NonMyo)
Bmp4/Bmpr1b	2	EOM	Z:\RNAscope\RNAscope Efnb1Ephb1_Bmp4Bmpr1b_PdgfaPdgfra_14102021\M5RE14_GFP488_Bmp4555_Bmpr1b633\02122021\emb2\slide2e\Image 6,czi	Ligand	Bmp4	Myo	1.498		Bmp4/Bmpr1b	2	EOM	Z:\RNAscope\RNAscope Efnb1Ephb1_Bmp4Bmpr1b_PdgfaPdgfra_14102021\M5RE14_GFP488_Bmp4555_Bmpr1b633\02122021\emb2\slide2e\Image 6.czi	Bmp4	Myo/Nonmyo	0.374528		Bmp4	1	0.566403		Bmp4/Bmpr1	1	-0.572727
Bmp4/Bmpr1b	2	EOM	Z:\RNAscope\RNAscope Efnb1Ephb1_Bmp4Bmpr1b_PdgfaPdgfra_14102021\M5RE14_GFP488_Bmp4555_Bmpr1b633\02122021\emb2\slide2e\Image 6,czi	Ligand	Bmp4	Nonmyo	3.9997		Bmp4/Bmpr1b	3	EOM	Z:\RNAscope\RNAscope Efnb1Ephb1_Bmp4Bmpr1b_PdgfaPdgfra_14102021\M5RE14_GFP488_Bmp4555_Bmpr1b633\02122021\emb3\slide2c\Image 16.czi	Bmp4	Myo/Nonmyo	0.272727		Bmp4	2	0.374528		Bmp4/Bmpr1	2	-0.476959
Bmp4/Bmpr1b	3	EOM	Z:\RNAscope\RNAscope Efnb1Ephb1_Bmp4Bmpr1b_PdgfaPdgfra_14102021\M5RE14_GFP488_Bmp4555_Bmpr1b633\02122021\emb3\slide2c\Image 16,czi	Ligand	Bmp4	Myo	0.102		Bmp4/Bmpr1b	1	EOM	Z:\RNAscope\RNAscope Efnb1Ephb1_Bmp4Bmpr1b_PdgfaPdgfra_14102021\M5RE14_GFP488_Bmp4555_Bmpr1b633\20102021\Image 3.lsm	Bmp4	Myo/Nonmyo	0.560178		Bmp4	3	0.272727		Bmp4/Bmpr1	3	-1.53769
Bmp4/Bmpr1b	3	EOM	Z:\RNAscope\RNAscope Efnb1Ephb1_Bmp4Bmpr1b_PdgfaPdgfra_14102021\M5RE14_GFP488_Bmp4555_Bmpr1b633\02122021\emb3\slide2c\Image 16,czi	Ligand	Bmp4	Nonmyo	0.374		Bmp4/Bmpr1b	1	EOM	Z:\RNAscope\RNAscope Efnb1Ephb1_Bmp4Bmpr1b_PdgfaPdgfra_14102021\M5RE14_GFP488_Bmp4555_Bmpr1b633\20102021\Image 8.lsm	Bmp4	Myo/Nonmyo	0.431299		Bmpr1b	1	1.13913		Efnb1/Ephrb1	1	-0.840116
Bmp4/Bmpr1b	1	EOM	Z:\RNAscope\RNAscope Efnb1Ephb1_Bmp4Bmpr1b_PdgfaPdgfra_14102021\M5RE14_GFP488_Bmp4555_Bmpr1b633\20102021\Image 3,lsm	Ligand	Bmp4	Myo	1.387		Bmp4/Bmpr1b	1	EOM	Z:\RNAscope\RNAscope Efnb1Ephb1_Bmp4Bmpr1b_PdgfaPdgfra_14102021\M5RE14_GFP488_Bmp4555_Bmpr1b633\Image 10.czi	Bmp4	Myo/Nonmyo	0.707731		Bmpr1b	2	0.851487		Efnb1/Ephrb1	2	-2.54555
Bmp4/Bmpr1b	1	EOM	Z:\RNAscope\RNAscope Efnb1Ephb1_Bmp4Bmpr1b_PdgfaPdgfra_14102021\M5RE14_GFP488_Bmp4555_Bmpr1b633\20102021\Image 3,lsm	Ligand	Bmp4	Nonmyo	2.476		Bmp4/Bmpr1b	1	EOM	Z:\RNAscope\RNAscope Efnb1Ephb1_Bmp4Bmpr1b_PdgfaPdgfra_14102021\M5RE14_GFP488_Bmp4555_Bmpr1b633\Image 13.czi	Bmp4	Myo/Nonmyo	#DIV/0!		Bmpr1b	3	1.81042		Efnb1/Ephrb1	3	-4.41541
Bmp4/Bmpr1b	1	EOM	Z:\RNAscope\RNAscope Efnb1Ephb1_Bmp4Bmpr1b_PdgfaPdgfra_14102021\M5RE14_GFP488_Bmp4555_Bmpr1b633\20102021\Image 8,lsm	Ligand	Bmp4	Myo	1.5855		Bmp4/Bmpr1b	2	EOM	Z:\RNAscope\RNAscope Efnb1Ephb1_Bmp4Bmpr1b_PdgfaPdgfra_14102021\M5RE14_GFP488_Bmp4555_Bmpr1b633\02122021\emb2\slide2e\Image 6.czi	Bmpr1b	Myo/Nonmyo	0.851487		Efnb1	1	0.51301		Pdgfa/Pdgfra	1	6.46926
Bmp4/Bmpr1b	1	EOM	Z:\RNAscope\RNAscope Efnb1Ephb1_Bmp4Bmpr1b_PdgfaPdgfra_14102021\M5RE14_GFP488_Bmp4555_Bmpr1b633\20102021\Image 8,lsm	Ligand	Bmp4	Nonmyo	3.6761		Bmp4/Bmpr1b	3	EOM	Z:\RNAscope\RNAscope Efnb1Ephb1_Bmp4Bmpr1b_PdgfaPdgfra_14102021\M5RE14_GFP488_Bmp4555_Bmpr1b633\02122021\emb3\slide2c\Image 16.czi	Bmpr1b	Myo/Nonmyo	1.81042		Efnb1	2	1.28338		Pdgfa/Pdgfra	2	2.55843
Bmp4/Bmpr1b	1	EOM	Z:\RNAscope\RNAscope Efnb1Ephb1_Bmp4Bmpr1b_PdgfaPdgfra_14102021\M5RE14_GFP488_Bmp4555_Bmpr1b633\Image 10,czi	Ligand	Bmp4	Myo	4.8527		Bmp4/Bmpr1b	1	EOM	Z:\RNAscope\RNAscope Efnb1Ephb1_Bmp4Bmpr1b_PdgfaPdgfra_14102021\M5RE14_GFP488_Bmp4555_Bmpr1b633\20102021\Image 3.lsm	Bmpr1b	Myo/Nonmyo	1.1505		Efnb1	3	3.95099		Pdgfa/Pdgfra	3	10.2145
Bmp4/Bmpr1b	1	EOM	Z:\RNAscope\RNAscope Efnb1Ephb1_Bmp4Bmpr1b_PdgfaPdgfra_14102021\M5RE14_GFP488_Bmp4555_Bmpr1b633\Image 10,czi	Ligand	Bmp4	Nonmyo	6.8567		Bmp4/Bmpr1b	1	EOM	Z:\RNAscope\RNAscope Efnb1Ephb1_Bmp4Bmpr1b_PdgfaPdgfra_14102021\M5RE14_GFP488_Bmp4555_Bmpr1b633\20102021\Image 8.lsm	Bmpr1b	Myo/Nonmyo	1.12374		Ephrb1	1	1.35313
Bmp4/Bmpr1b	1	EOM	Z:\RNAscope\RNAscope Efnb1Ephb1_Bmp4Bmpr1b_PdgfaPdgfra_14102021\M5RE14_GFP488_Bmp4555_Bmpr1b633\Image 13,czi	Ligand	Bmp4	Myo			Bmp4/Bmpr1b	1	EOM	Z:\RNAscope\RNAscope Efnb1Ephb1_Bmp4Bmpr1b_PdgfaPdgfra_14102021\M5RE14_GFP488_Bmp4555_Bmpr1b633\Image 10.czi	Bmpr1b	Myo/Nonmyo	1.15452		Ephrb1	2	3.82893
Bmp4/Bmpr1b	1	EOM	Z:\RNAscope\RNAscope Efnb1Ephb1_Bmp4Bmpr1b_PdgfaPdgfra_14102021\M5RE14_GFP488_Bmp4555_Bmpr1b633\Image 13,czi	Ligand	Bmp4	Nonmyo			Bmp4/Bmpr1b	1	EOM	Z:\RNAscope\RNAscope Efnb1Ephb1_Bmp4Bmpr1b_PdgfaPdgfra_14102021\M5RE14_GFP488_Bmp4555_Bmpr1b633\Image 13.czi	Bmpr1b	Myo/Nonmyo	#DIV/0!		Ephrb1	3	8.36639
Bmp4/Bmpr1b	2	EOM	Z:\RNAscope\RNAscope Efnb1Ephb1_Bmp4Bmpr1b_PdgfaPdgfra_14102021\M5RE14_GFP488_Bmp4555_Bmpr1b633\02122021\emb2\slide2e\Image 6,czi	Receptor	Bmpr1b	Myo	0.8732		Efnb1/Ephb1	2	EOM	Z:\RNAscope\RNAscope Efnb1Ephb1_Bmp4Bmpr1b_PdgfaPdgfra_14102021\M5RE14_GFP488_Efnb1555_Ephb1633\02122021\emb 2\slide2d\Image 11.czi	Efnb1	Myo/Nonmyo	1.0992		Pdgfa	1	6.91834
Bmp4/Bmpr1b	2	EOM	Z:\RNAscope\RNAscope Efnb1Ephb1_Bmp4Bmpr1b_PdgfaPdgfra_14102021\M5RE14_GFP488_Bmp4555_Bmpr1b633\02122021\emb2\slide2e\Image 6,czi	Receptor	Bmpr1b	Nonmyo	1.0255		Efnb1/Ephb1	2	EOM	Z:\RNAscope\RNAscope Efnb1Ephb1_Bmp4Bmpr1b_PdgfaPdgfra_14102021\M5RE14_GFP488_Efnb1555_Ephb1633\02122021\emb 2\slide2d\Image 12.czi	Efnb1	Myo/Nonmyo	1.46756		Pdgfa	2	3.41431
Bmp4/Bmpr1b	3	EOM	Z:\RNAscope\RNAscope Efnb1Ephb1_Bmp4Bmpr1b_PdgfaPdgfra_14102021\M5RE14_GFP488_Bmp4555_Bmpr1b633\02122021\emb3\slide2c\Image 16,czi	Receptor	Bmpr1b	Myo	1.251		Efnb1/Ephb1	3	EOM	Z:\RNAscope\RNAscope Efnb1Ephb1_Bmp4Bmpr1b_PdgfaPdgfra_14102021\M5RE14_GFP488_Efnb1555_Ephb1633\02122021\Embryo 3\slide 2e\section4\Image 3.czi	Efnb1	Myo/Nonmyo	3.04074		Pdgfa	3	10.4056
Bmp4/Bmpr1b	3	EOM	Z:\RNAscope\RNAscope Efnb1Ephb1_Bmp4Bmpr1b_PdgfaPdgfra_14102021\M5RE14_GFP488_Bmp4555_Bmpr1b633\02122021\emb3\slide2c\Image 16,czi	Receptor	Bmpr1b	Nonmyo	0.691		Efnb1/Ephb1	3	EOM	Z:\RNAscope\RNAscope Efnb1Ephb1_Bmp4Bmpr1b_PdgfaPdgfra_14102021\M5RE14_GFP488_Efnb1555_Ephb1633\02122021\Embryo 3\slide 2e\section4\Image 5.czi	Efnb1	Myo/Nonmyo	4.86123		Pdgfra	1	0.449082
Bmp4/Bmpr1b	1	EOM	Z:\RNAscope\RNAscope Efnb1Ephb1_Bmp4Bmpr1b_PdgfaPdgfra_14102021\M5RE14_GFP488_Bmp4555_Bmpr1b633\20102021\Image 3,lsm	Receptor	Bmpr1b	Myo	1.483		Efnb1/Ephb1	1	EOM	Z:\RNAscope\RNAscope Efnb1Ephb1_Bmp4Bmpr1b_PdgfaPdgfra_14102021\M5RE14_GFP488_Efnb1555_Ephb1633\Image 6_here.czi	Efnb1	Myo/Nonmyo	0.51301		Pdgfra	2	0.855879
Bmp4/Bmpr1b	1	EOM	Z:\RNAscope\RNAscope Efnb1Ephb1_Bmp4Bmpr1b_PdgfaPdgfra_14102021\M5RE14_GFP488_Bmp4555_Bmpr1b633\20102021\Image 3,lsm	Receptor	Bmpr1b	Nonmyo	1.289		Efnb1/Ephb1	2	EOM	Z:\RNAscope\RNAscope Efnb1Ephb1_Bmp4Bmpr1b_PdgfaPdgfra_14102021\M5RE14_GFP488_Efnb1555_Ephb1633\02122021\emb 2\slide2d\Image 11.czi	Ephrb1	Myo/Nonmyo	3.42418		Pdgfra	3	0.191141
Bmp4/Bmpr1b	1	EOM	Z:\RNAscope\RNAscope Efnb1Ephb1_Bmp4Bmpr1b_PdgfaPdgfra_14102021\M5RE14_GFP488_Bmp4555_Bmpr1b633\20102021\Image 8,lsm	Receptor	Bmpr1b	Myo	7.387		Efnb1/Ephb1	2	EOM	Z:\RNAscope\RNAscope Efnb1Ephb1_Bmp4Bmpr1b_PdgfaPdgfra_14102021\M5RE14_GFP488_Efnb1555_Ephb1633\02122021\emb 2\slide2d\Image 12.czi	Ephrb1	Myo/Nonmyo	4.23368
Bmp4/Bmpr1b	1	EOM	Z:\RNAscope\RNAscope Efnb1Ephb1_Bmp4Bmpr1b_PdgfaPdgfra_14102021\M5RE14_GFP488_Bmp4555_Bmpr1b633\20102021\Image 8,lsm	Receptor	Bmpr1b	Nonmyo	6.5736		Efnb1/Ephb1	3	EOM	Z:\RNAscope\RNAscope Efnb1Ephb1_Bmp4Bmpr1b_PdgfaPdgfra_14102021\M5RE14_GFP488_Efnb1555_Ephb1633\02122021\Embryo 3\slide 2e\section4\Image 3.czi	Ephrb1	Myo/Nonmyo	11.7915
Bmp4/Bmpr1b	1	EOM	Z:\RNAscope\RNAscope Efnb1Ephb1_Bmp4Bmpr1b_PdgfaPdgfra_14102021\M5RE14_GFP488_Bmp4555_Bmpr1b633\Image 10,czi	Receptor	Bmpr1b	Myo	6.7879		Efnb1/Ephb1	3	EOM	Z:\RNAscope\RNAscope Efnb1Ephb1_Bmp4Bmpr1b_PdgfaPdgfra_14102021\M5RE14_GFP488_Efnb1555_Ephb1633\02122021\Embryo 3\slide 2e\section4\Image 5.czi	Ephrb1	Myo/Nonmyo	4.94127
Bmp4/Bmpr1b	1	EOM	Z:\RNAscope\RNAscope Efnb1Ephb1_Bmp4Bmpr1b_PdgfaPdgfra_14102021\M5RE14_GFP488_Bmp4555_Bmpr1b633\Image 10,czi	Receptor	Bmpr1b	Nonmyo	5.8794		Efnb1/Ephb1	1	EOM	Z:\RNAscope\RNAscope Efnb1Ephb1_Bmp4Bmpr1b_PdgfaPdgfra_14102021\M5RE14_GFP488_Efnb1555_Ephb1633\Image 6_here.czi	Ephrb1	Myo/Nonmyo	1.35313
Bmp4/Bmpr1b	1	EOM	Z:\RNAscope\RNAscope Efnb1Ephb1_Bmp4Bmpr1b_PdgfaPdgfra_14102021\M5RE14_GFP488_Bmp4555_Bmpr1b633\Image 13,czi	Receptor	Bmpr1b	Myo			Pdgfa/Pdgfra	2	EOM	Y:\1_Lab Members\Alex Glenda MyoCt\2020Augost05_Rnascope\AG16_PDGFs_40x_EOM.czi	Pdgfa	Myo/Nonmyo	3.41431
Bmp4/Bmpr1b	1	EOM	Z:\RNAscope\RNAscope Efnb1Ephb1_Bmp4Bmpr1b_PdgfaPdgfra_14102021\M5RE14_GFP488_Bmp4555_Bmpr1b633\Image 13,czi	Receptor	Bmpr1b	Nonmyo			Pdgfa/Pdgfra	1	EOM	Y:\1_Lab Members\Alex Glenda MyoCt\2020Augost05_Rnascope\AG18_PDGFs_40x_EOM2_pic2.lsm	Pdgfa	Myo/Nonmyo	5.10912
Efnb1/Ephb1	2	EOM	Z:\RNAscope\RNAscope Efnb1Ephb1_Bmp4Bmpr1b_PdgfaPdgfra_14102021\M5RE14_GFP488_Efnb1555_Ephb1633\02122021\emb 2\slide2d\Image 11,czi	Ligand	Efnb1	Myo	9.9725		Pdgfa/Pdgfra	1	EOM	Y:\1_Lab Members\Alex Glenda MyoCt\2020Augost05_Rnascope\AG18_PDGFs_40x_EOM2_pic4.lsm	Pdgfa	Myo/Nonmyo	10.1475
Efnb1/Ephb1	2	EOM	Z:\RNAscope\RNAscope Efnb1Ephb1_Bmp4Bmpr1b_PdgfaPdgfra_14102021\M5RE14_GFP488_Efnb1555_Ephb1633\02122021\emb 2\slide2d\Image 11,czi	Ligand	Efnb1	Nonmyo	9.0725		Pdgfa/Pdgfra	1	EOM	Y:\1_Lab Members\Alex Glenda MyoCt\2020Augost05_Rnascope\AG18_PDGFs_40x_EOM2_pic5.lsm	Pdgfa	Myo/Nonmyo	5.4984
Efnb1/Ephb1	2	EOM	Z:\RNAscope\RNAscope Efnb1Ephb1_Bmp4Bmpr1b_PdgfaPdgfra_14102021\M5RE14_GFP488_Efnb1555_Ephb1633\02122021\emb 2\slide2d\Image 12,czi	Ligand	Efnb1	Myo	3.3459		Pdgfa/Pdgfra	3	EOM	Z:\RNAscope\RNAscope Efnb1Ephb1_Bmp4Bmpr1b_PdgfaPdgfra_14102021\M5RE14_GFP488_Pdgfa555_Pdgfra633\03112021\Image 9.lsm	Pdgfa	Myo/Nonmyo	10.4056
Efnb1/Ephb1	2	EOM	Z:\RNAscope\RNAscope Efnb1Ephb1_Bmp4Bmpr1b_PdgfaPdgfra_14102021\M5RE14_GFP488_Efnb1555_Ephb1633\02122021\emb 2\slide2d\Image 12,czi	Ligand	Efnb1	Nonmyo	2.2799		Pdgfa/Pdgfra	2	EOM	Y:\1_Lab Members\Alex Glenda MyoCt\2020Augost05_Rnascope\AG16_PDGFs_40x_EOM.czi	Pdgfra	Myo/Nonmyo	0.855879
Efnb1/Ephb1	3	EOM	Z:\RNAscope\RNAscope Efnb1Ephb1_Bmp4Bmpr1b_PdgfaPdgfra_14102021\M5RE14_GFP488_Efnb1555_Ephb1633\02122021\Embryo 3\slide 2e\section4\Image 3,czi	Ligand	Efnb1	Myo	6.7915		Pdgfa/Pdgfra	1	EOM	Y:\1_Lab Members\Alex Glenda MyoCt\2020Augost05_Rnascope\AG18_PDGFs_40x_EOM2_pic2.lsm	Pdgfra	Myo/Nonmyo	0.402219
Efnb1/Ephb1	3	EOM	Z:\RNAscope\RNAscope Efnb1Ephb1_Bmp4Bmpr1b_PdgfaPdgfra_14102021\M5RE14_GFP488_Efnb1555_Ephb1633\02122021\Embryo 3\slide 2e\section4\Image 3,czi	Ligand	Efnb1	Nonmyo	2.2335		Pdgfa/Pdgfra	1	EOM	Y:\1_Lab Members\Alex Glenda MyoCt\2020Augost05_Rnascope\AG18_PDGFs_40x_EOM2_pic4.lsm	Pdgfra	Myo/Nonmyo	0.527775
Efnb1/Ephb1	3	EOM	Z:\RNAscope\RNAscope Efnb1Ephb1_Bmp4Bmpr1b_PdgfaPdgfra_14102021\M5RE14_GFP488_Efnb1555_Ephb1633\02122021\Embryo 3\slide 2e\section4\Image 5,czi	Ligand	Efnb1	Myo	9.2203		Pdgfa/Pdgfra	1	EOM	Y:\1_Lab Members\Alex Glenda MyoCt\2020Augost05_Rnascope\AG18_PDGFs_40x_EOM2_pic5.lsm	Pdgfra	Myo/Nonmyo	0.417253
Efnb1/Ephb1	3	EOM	Z:\RNAscope\RNAscope Efnb1Ephb1_Bmp4Bmpr1b_PdgfaPdgfra_14102021\M5RE14_GFP488_Efnb1555_Ephb1633\02122021\Embryo 3\slide 2e\section4\Image 5,czi	Ligand	Efnb1	Nonmyo	1.8967		Pdgfa/Pdgfra	3	EOM	Z:\RNAscope\RNAscope Efnb1Ephb1_Bmp4Bmpr1b_PdgfaPdgfra_14102021\M5RE14_GFP488_Pdgfa555_Pdgfra633\03112021\Image 9.lsm	Pdgfra	Myo/Nonmyo	0.191141
Efnb1/Ephb1	1	EOM	Z:\RNAscope\RNAscope Efnb1Ephb1_Bmp4Bmpr1b_PdgfaPdgfra_14102021\M5RE14_GFP488_Efnb1555_Ephb1633\Image 6_here,czi	Ligand	Efnb1	Myo	3.3695
Efnb1/Ephb1	1	EOM	Z:\RNAscope\RNAscope Efnb1Ephb1_Bmp4Bmpr1b_PdgfaPdgfra_14102021\M5RE14_GFP488_Efnb1555_Ephb1633\Image 6_here,czi	Ligand	Efnb1	Nonmyo	6.5681
Efnb1/Ephb1	2	EOM	Z:\RNAscope\RNAscope Efnb1Ephb1_Bmp4Bmpr1b_PdgfaPdgfra_14102021\M5RE14_GFP488_Efnb1555_Ephb1633\02122021\emb 2\slide2d\Image 11,czi	Receptor	Ephrb1	Myo	4.7014
Efnb1/Ephb1	2	EOM	Z:\RNAscope\RNAscope Efnb1Ephb1_Bmp4Bmpr1b_PdgfaPdgfra_14102021\M5RE14_GFP488_Efnb1555_Ephb1633\02122021\emb 2\slide2d\Image 11,czi	Receptor	Ephrb1	Nonmyo	1.373
Efnb1/Ephb1	2	EOM	Z:\RNAscope\RNAscope Efnb1Ephb1_Bmp4Bmpr1b_PdgfaPdgfra_14102021\M5RE14_GFP488_Efnb1555_Ephb1633\02122021\emb 2\slide2d\Image 12,czi	Receptor	Ephrb1	Myo	1.2193
Efnb1/Ephb1	2	EOM	Z:\RNAscope\RNAscope Efnb1Ephb1_Bmp4Bmpr1b_PdgfaPdgfra_14102021\M5RE14_GFP488_Efnb1555_Ephb1633\02122021\emb 2\slide2d\Image 12,czi	Receptor	Ephrb1	Nonmyo	0.288
Efnb1/Ephb1	3	EOM	Z:\RNAscope\RNAscope Efnb1Ephb1_Bmp4Bmpr1b_PdgfaPdgfra_14102021\M5RE14_GFP488_Efnb1555_Ephb1633\02122021\Embryo 3\slide 2e\section4\Image 3,czi	Receptor	Ephrb1	Myo	8.1503
Efnb1/Ephb1	3	EOM	Z:\RNAscope\RNAscope Efnb1Ephb1_Bmp4Bmpr1b_PdgfaPdgfra_14102021\M5RE14_GFP488_Efnb1555_Ephb1633\02122021\Embryo 3\slide 2e\section4\Image 3,czi	Receptor	Ephrb1	Nonmyo	0.6912
Efnb1/Ephb1	3	EOM	Z:\RNAscope\RNAscope Efnb1Ephb1_Bmp4Bmpr1b_PdgfaPdgfra_14102021\M5RE14_GFP488_Efnb1555_Ephb1633\02122021\Embryo 3\slide 2e\section4\Image 5,czi	Receptor	Ephrb1	Myo	8.9516
Efnb1/Ephb1	3	EOM	Z:\RNAscope\RNAscope Efnb1Ephb1_Bmp4Bmpr1b_PdgfaPdgfra_14102021\M5RE14_GFP488_Efnb1555_Ephb1633\02122021\Embryo 3\slide 2e\section4\Image 5,czi	Receptor	Ephrb1	Nonmyo	1.8116
Efnb1/Ephb1	1	EOM	Z:\RNAscope\RNAscope Efnb1Ephb1_Bmp4Bmpr1b_PdgfaPdgfra_14102021\M5RE14_GFP488_Efnb1555_Ephb1633\Image 6_here,czi	Receptor	Ephrb1	Myo	2.6229
Efnb1/Ephb1	1	EOM	Z:\RNAscope\RNAscope Efnb1Ephb1_Bmp4Bmpr1b_PdgfaPdgfra_14102021\M5RE14_GFP488_Efnb1555_Ephb1633\Image 6_here,czi	Receptor	Ephrb1	Nonmyo	1.9384
Pdgfa/Pdgfra	2	EOM	Y:\1_Lab Members\Alex Glenda MyoCt\2020Augost05_Rnascope\AG16_PDGFs_40x_EOM,czi	Ligand	Pdgfa	Myo	28.181
Pdgfa/Pdgfra	2	EOM	Y:\1_Lab Members\Alex Glenda MyoCt\2020Augost05_Rnascope\AG16_PDGFs_40x_EOM,czi	Ligand	Pdgfa	Nonmyo	8.2538
Pdgfa/Pdgfra	1	EOM	Y:\1_Lab Members\Alex Glenda MyoCt\2020Augost05_Rnascope\AG18_PDGFs_40x_EOM2_pic2,lsm	Ligand	Pdgfa	Myo	12.6936
Pdgfa/Pdgfra	1	EOM	Y:\1_Lab Members\Alex Glenda MyoCt\2020Augost05_Rnascope\AG18_PDGFs_40x_EOM2_pic2,lsm	Ligand	Pdgfa	Nonmyo	2.4845
Pdgfa/Pdgfra	1	EOM	Y:\1_Lab Members\Alex Glenda MyoCt\2020Augost05_Rnascope\AG18_PDGFs_40x_EOM2_pic4,lsm	Ligand	Pdgfa	Myo	19.3249
Pdgfa/Pdgfra	1	EOM	Y:\1_Lab Members\Alex Glenda MyoCt\2020Augost05_Rnascope\AG18_PDGFs_40x_EOM2_pic4,lsm	Ligand	Pdgfa	Nonmyo	1.9044
Pdgfa/Pdgfra	1	EOM	Y:\1_Lab Members\Alex Glenda MyoCt\2020Augost05_Rnascope\AG18_PDGFs_40x_EOM2_pic5,lsm	Ligand	Pdgfa	Myo	8.4219
Pdgfa/Pdgfra	1	EOM	Y:\1_Lab Members\Alex Glenda MyoCt\2020Augost05_Rnascope\AG18_PDGFs_40x_EOM2_pic5,lsm	Ligand	Pdgfa	Nonmyo	1.5317
Pdgfa/Pdgfra	3	EOM	Z:\RNAscope\RNAscope Efnb1Ephb1_Bmp4Bmpr1b_PdgfaPdgfra_14102021\M5RE14_GFP488_Pdgfa555_Pdgfra633\03112021\Image 9,lsm	Ligand	Pdgfa	Myo	2.7679
Pdgfa/Pdgfra	3	EOM	Z:\RNAscope\RNAscope Efnb1Ephb1_Bmp4Bmpr1b_PdgfaPdgfra_14102021\M5RE14_GFP488_Pdgfa555_Pdgfra633\03112021\Image 9,lsm	Ligand	Pdgfa	Nonmyo	0.266
Pdgfa/Pdgfra	2	EOM	Y:\1_Lab Members\Alex Glenda MyoCt\2020Augost05_Rnascope\AG16_PDGFs_40x_EOM,czi	Receptor	Pdgfra	Myo	18.5938
Pdgfa/Pdgfra	2	EOM	Y:\1_Lab Members\Alex Glenda MyoCt\2020Augost05_Rnascope\AG16_PDGFs_40x_EOM,czi	Receptor	Pdgfra	Nonmyo	21.7248
Pdgfa/Pdgfra	1	EOM	Y:\1_Lab Members\Alex Glenda MyoCt\2020Augost05_Rnascope\AG18_PDGFs_40x_EOM2_pic2,lsm	Receptor	Pdgfra	Myo	9.4489
Pdgfa/Pdgfra	1	EOM	Y:\1_Lab Members\Alex Glenda MyoCt\2020Augost05_Rnascope\AG18_PDGFs_40x_EOM2_pic2,lsm	Receptor	Pdgfra	Nonmyo	23.4919
Pdgfa/Pdgfra	1	EOM	Y:\1_Lab Members\Alex Glenda MyoCt\2020Augost05_Rnascope\AG18_PDGFs_40x_EOM2_pic4,lsm	Receptor	Pdgfra	Myo	6.8834
Pdgfa/Pdgfra	1	EOM	Y:\1_Lab Members\Alex Glenda MyoCt\2020Augost05_Rnascope\AG18_PDGFs_40x_EOM2_pic4,lsm	Receptor	Pdgfra	Nonmyo	13.0423
Pdgfa/Pdgfra	1	EOM	Y:\1_Lab Members\Alex Glenda MyoCt\2020Augost05_Rnascope\AG18_PDGFs_40x_EOM2_pic5,lsm	Receptor	Pdgfra	Myo	6.5038
Pdgfa/Pdgfra	1	EOM	Y:\1_Lab Members\Alex Glenda MyoCt\2020Augost05_Rnascope\AG18_PDGFs_40x_EOM2_pic5,lsm	Receptor	Pdgfra	Nonmyo	15.5872
Pdgfa/Pdgfra	3	EOM	Z:\RNAscope\RNAscope Efnb1Ephb1_Bmp4Bmpr1b_PdgfaPdgfra_14102021\M5RE14_GFP488_Pdgfa555_Pdgfra633\03112021\Image 9,lsm	Receptor	Pdgfra	Myo	0.8307
Pdgfa/Pdgfra	3	EOM	Z:\RNAscope\RNAscope Efnb1Ephb1_Bmp4Bmpr1b_PdgfaPdgfra_14102021\M5RE14_GFP488_Pdgfa555_Pdgfra633\03112021\Image 9,lsm	Receptor	Pdgfra	Nonmyo	4.346
