# Supplementary material for: Identification of bipotent progenitors that give rise to myogenic and connective tissues in mouse
Source: eLife. 2022 Feb 28;11:e70235. doi: 10.7554/eLife.70235 (PMC9020825; doi:10.7554/eLife.70235)
Supplement: Figure 5—figure supplement 1—source data 1. [file elife-70235-fig5-figsupp1-data1.xlsx]

## Sheet: Feuil1 (2)
L/R	embryo	Region	Filepath	Ligand or Receptor	Probe	ROI	Value
Scube1	1	EOM	Y:\1_Lab Members\Alex Glenda MyoCt\2020Augost05_Rnascope\AG18_scube_40x_EOM1,lsm	Ligand	Scube1	Myo	1.8622
Scube1	1	EOM	Y:\1_Lab Members\Alex Glenda MyoCt\2020Augost05_Rnascope\AG18_scube_40x_EOM1,lsm	Ligand	Scube1	Nonmyo	17.3539
Scube1	2	EOM	Z:\RNAscope\RNAscopeScube1\03122021\Image 18,czi	Ligand	Scube1	Myo	1.4144
Scube1	2	EOM	Z:\RNAscope\RNAscopeScube1\03122021\Image 18,czi	Ligand	Scube1	Nonmyo	17.0643
