# Supplementary material for: Identification of bipotent progenitors that give rise to myogenic and connective tissues in mouse
Source: eLife. 2022 Feb 28;11:e70235. doi: 10.7554/eLife.70235 (PMC9020825; doi:10.7554/eLife.70235)
Supplement: Figure 5—source data 1. [file elife-70235-fig5-data1.xlsx]

## Sheet: Sheet1
Line	Stage	Embryo	Region	Positive	total	Percent	Notes
Myf5nlacZ/+	E12.5	1	EOM	112	266	42.1053
Myf5nlacZ/nlacZ	E12.5	1	EOM	263	348	75.5747
Myf5nlacZ/+	E12.5	2	EOM	41	158	25.9494
Myf5nlacZ/nlacZ	E12.5	2	EOM	166	260	63.8462
Myf5nlacZ/+	E12.5	3	EOM	83	464	17.8879
Myf5nlacZ/nlacZ	E12.5	3	EOM	334	461	72.4512
Myf5nlacZ/+	E12.5	1	Masseter	0	100	0	No detectable double positive cells
Myf5nlacZ/nlacZ	E12.5	1	Masseter	0	100	0	No detectable double positive cells
Myf5nlacZ/+	E12.5	2	Masseter	0	100	0	No detectable double positive cells
Myf5nlacZ/nlacZ	E12.5	2	Masseter	0	100	0	No detectable double positive cells
Myf5nlacZ/+	E12.5	3	Masseter	0	100	0	No detectable double positive cells
Myf5nlacZ/nlacZ	E12.5	3	Masseter	0	100	0	No detectable double positive cells
