# Supplementary material for: Identification of bipotent progenitors that give rise to myogenic and connective tissues in mouse
Source: eLife. 2022 Feb 28;11:e70235. doi: 10.7554/eLife.70235 (PMC9020825; doi:10.7554/eLife.70235)
Supplement: Figure 5—source data 2. [file elife-70235-fig5-data2.xlsx]

## Sheet: Sheet1
Line	embryo	Region	Filepath	Width (microns)	Height (microns)	Area of picture (micron2)	ROI area in percentage of total area	Absolute number of double positive cells	Number of cells if muscle covered the whole image	Number of cells/100micron2 Area
MyodiCre;R26Tom;PdgfraGFP	1	EOM	Y:\1_Lab Members\Alex Glenda MyoCt\2020Sept17_MyodiCre\AG71_EOM_pic2.czi	1477.59	903.68	1.33527e+06	7.788	55	706.215	5.28893
MyodiCre;R26Tom;PdgfraGFP	1	Mandible	Z:\1_Lab Members\Alex Glenda MyoCt\2020Sept17_MyodiCre\AG71_mandible_40x.czi	611.42	610.79	373449	37.3018	1	2.68084	0.0717858
MyodiCre;R26Tom;PdgfraGFP	1	Back	Y:\1_Lab Members\Alex Glenda MyoCt\2020Sept17_MyodiCre\AG71_back.czi	2636.34	2057.75	5.42493e+06	8.8273	42	475.797	0.877056
MyodiCre;R26Tom;PdgfraGFP	2	EOM	Y:\1_Lab Members\Alex Glenda MyoCt\2020Sept17_MyodiCre\AG72_EOM_pic2.czi	1476.96	1187.51	1.7539e+06	12.8928	48	372.301	2.1227
MyodiCre;R26Tom;PdgfraGFP	2	Mandible	Z:\1_Lab Members\Alex Glenda MyoCt\2020Sept17_MyodiCre\AG72_mandible_40x.czi	611	612	373932	20.8578	0	0	0
MyodiCre;R26Tom;PdgfraGFP	2	Back	Y:\1_Lab Members\Alex Glenda MyoCt\2020Sept17_MyodiCre\AG72_back.czi	1766.73	1767.04	3.12188e+06	10.4609	6	57.3564	0.183724
MyodiCre;R26Tom;PdgfraGFP	3	EOM	Z:\MyodicreTomPdgfraGFP E145\endoGFP488Dsred555Moydmyog633 26102021\slide2\27102021\Image 3.czi	320	320	102400	25.9239	11	42.4319	4.14374
MyodiCre;R26Tom;PdgfraGFP	3	EOM	Z:\MyodicreTomPdgfraGFP E145\endoGFP488Dsred555Moydmyog633 26102021\slide2\27102021\Image 4.czi	320	320	102400	56.4844	21	37.1784	3.6307
MyodiCre;R26Tom;PdgfraGFP	3	Back	Y:\MyodicreTomPdgfraGFP E145\endoGFP488Dsred555Moydmyog633 26102021\slide3\back muscles\Image 6.czi	610.79	607.66	371153	56.6151	3	5.29894	0.14277
MyodiCre;R26Tom;PdgfraGFP	3	Mandible	Z:\MyodicreTomPdgfraGFP E145\endoGFP488Dsred555Moydmyog633 26102021\slide2\27102021\masticatory muscles\Image 5.czi	320	320	102400	44.2964	0	0	0
MyodiCre;R26Tom;PdgfraGFP	4	EOM	Z:\MyodicreTomPdgfraGFP E145\endoGFP488Dsred555Moydmyog633 29112021\slide2c\Image 6.czi	611.1	615.79	376309	28.0553	3	10.6932	0.284159
MyodiCre;R26Tom;PdgfraGFP	4	EOM	Z:\MyodicreTomPdgfraGFP E145\endoGFP488Dsred555Moydmyog633 29112021\slide2c\Image 15.czi	609.85	612.67	373637	15.6066	67	429.306	11.4899
MyodiCre;R26Tom;PdgfraGFP	4	Mandible	Z:\MyodicreTomPdgfraGFP E145\endoGFP488Dsred555Moydmyog633 29112021\slide2c\Image 6.czi	611.1	615.79	376309	25.9818	0	0	0
MyodiCre;R26Tom;PdgfraGFP	4	Back	Z:\MyodicreTomPdgfraGFP E145\endoGFP488Dsred555Moydmyog633 29112021\slide2c\Image 6.czi	611.1	615.79	376309	8.582	56	652.529	17.3402
MyodiCre;R26Tom;PdgfraGFP	4	Mandible	Z:\MyodicreTomPdgfraGFP E145\endoGFP488Dsred555Moydmyog633 29112021\slide2c\Image 15.czi	609.85	612.67	373637	29.3732	0	0	0
MyodiCre;R26Tom;PdgfraGFP	4	EOM	Z:\MyodicreTomPdgfraGFP E145\endoGFP488Dsred555Moydmyog633 29112021\SLIDE3C\Image 8.czi	611.73	611.73	374214	38.2811	70	182.858	4.88646
MyodiCre;R26Tom;PdgfraGFP	4	Mandible	Z:\MyodicreTomPdgfraGFP E145\endoGFP488Dsred555Moydmyog633 29112021\SLIDE3C\Image 8.czi	611.73	611.73	374214	13.6693	0	0	0
MyodiCre;R26Tom;PdgfraGFP	4	Back	Z:\MyodicreTomPdgfraGFP E145\endoGFP488Dsred555Moydmyog633 29112021\SLIDE3C\Image 8.czi	611.73	611.73	374214	16.2602	0	0	0
MyodiCre;R26Tom;PdgfraGFP	4	Mandible	Z:\MyodicreTomPdgfraGFP E145\endoGFP488Dsred555Moydmyog633 29112021\SLIDE3C\Image 9.czi	612.04	611.73	374403	22.615	0	0	0
MyodiCre;R26Tom;PdgfraGFP	4	Back	Z:\MyodicreTomPdgfraGFP E145\endoGFP488Dsred555Moydmyog633 29112021\SLIDE3C\Image 9.czi	612.04	611.73	374403	22.9381	0	0	0
Line	embryo	Region	Number of cells/100micron2 Area
MyodiCre;R26Tom;PdgfraGFP	1	EOM	5.28893
MyodiCre;R26Tom;PdgfraGFP	1	Mandible	0.0717858
MyodiCre;R26Tom;PdgfraGFP	1	Back	0.877056
MyodiCre;R26Tom;PdgfraGFP	2	EOM	2.1227
MyodiCre;R26Tom;PdgfraGFP	2	Mandible	0
MyodiCre;R26Tom;PdgfraGFP	2	Back	0.183724
MyodiCre;R26Tom;PdgfraGFP	3	EOM	1.88674
MyodiCre;R26Tom;PdgfraGFP	3	Back	0.14277
MyodiCre;R26Tom;PdgfraGFP	3	Mandible	0
MyodiCre;R26Tom;PdgfraGFP	4	EOM	3.82997
MyodiCre;R26Tom;PdgfraGFP	4	Back	5.55667
MyodiCre;R26Tom;PdgfraGFP	4	Mandible	0
