# Supplementary material for: Identification of bipotent progenitors that give rise to myogenic and connective tissues in mouse
Source: eLife. 2022 Feb 28;11:e70235. doi: 10.7554/eLife.70235 (PMC9020825; doi:10.7554/eLife.70235)
Supplement: Figure 7—source data 1. [file elife-70235-fig7-data1.xlsx]

## Sheet: Feuil1
Sample	Embryo	Region	Mean fluo Foxp2
Myf5CreCapp;R26Tom;PdgfraGFP E12.5 Gelatin no AR	1	EOM	6.675
Myf5CreCapp;R26Tom;PdgfraGFP E12.5 Gelatin no AR	1	Mandible	2.605
Myf5CreCapp;R26Tom;PdgfraGFP E12.5 Gelatin no AR	1	Back	1.489
Myf5CreCapp;R26Tom;PdgfraGFP E12.5 Gelatin no AR	2	EOM	13.123
Myf5CreCapp;R26Tom;PdgfraGFP E12.5 Gelatin no AR	2	Mandible	4.438
Myf5CreCapp;R26Tom;PdgfraGFP E12.5 Gelatin no AR	2	Back	9.1
Myf5CreCapp;R26Tom;PdgfraGFP E12.5 Gelatin no AR	3	EOM	10.764
Myf5CreCapp;R26Tom;PdgfraGFP E12.5 Gelatin no AR	3	Mandible	5.073
Myf5CreCapp;R26Tom;PdgfraGFP E12.5 Gelatin no AR	3	Back	3.2
