# Supplementary material for: Identification of bipotent progenitors that give rise to myogenic and connective tissues in mouse
Source: eLife journal article supplement (doi:10.7554/elife.70235), 2022-02-28
Supplement: supp [file elife_poa_e70235_Figure_2_figure_supplement_1.pdf › elife_poa_e70235_Figure_2_figure_supplement_1.pdf]

Mesp1<sup>Cre/+</sup>;R26<sup>mTmG/+</sup> E10.5 subset

Cell cycle phases

A

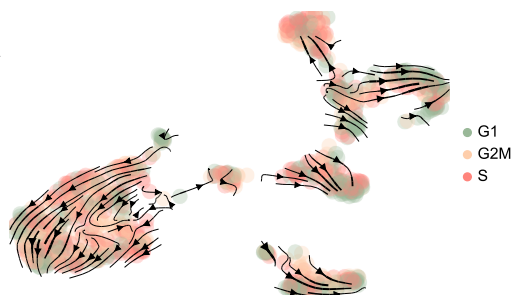

scvelo metrics

B

velocity length

velocity confidence

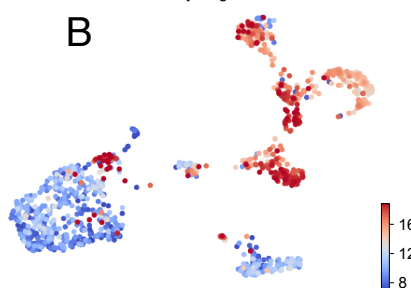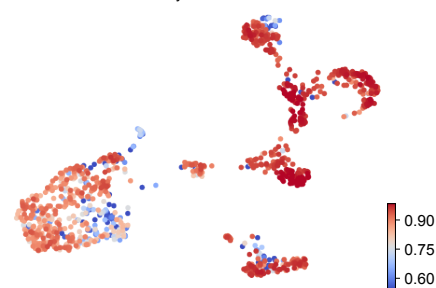

C

spliced unspliced

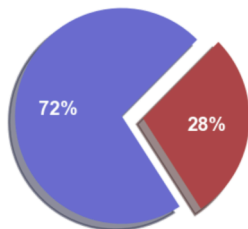

spliced unspliced

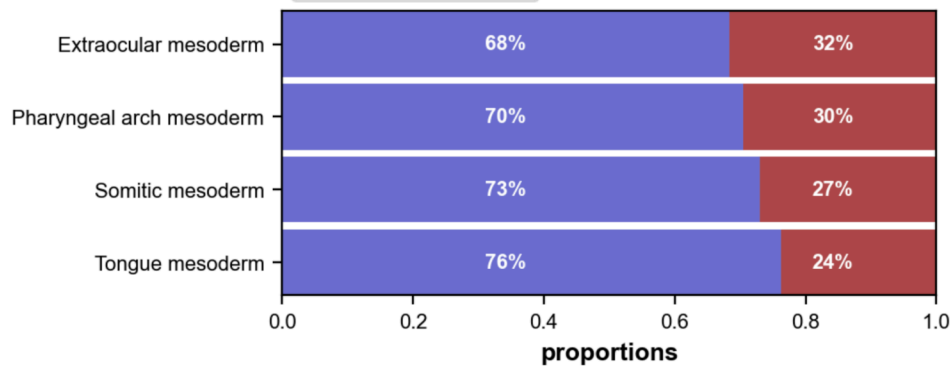

D

|                     | meso | Extraocular mesoderm | Pharyngeal arch mesoderm | Somitic mesoderm | Tongue mesoderm |
|---------------------|------|----------------------|--------------------------|------------------|-----------------|
| velocity_length     |      | 10.8044              | 16.0034                  | 10.1038          | 12.7088         |
| velocity_confidence |      | 0.88708              | 0.926174                 | 0.805735         | 0.852434        |
