# Supplementary material for: Identification of bipotent progenitors that give rise to myogenic and connective tissues in mouse
Source: eLife journal article supplement (doi:10.7554/elife.70235), 2022-02-28
Supplement: supp [file elife_poa_e70235_Figure_4_figure_supplement_1.pdf › elife_poa_e70235_Figure_4_figure_supplement_1.pdf]

Myf5<sup>Cre/+</sup>;R26<sup>mTmG/+</sup> E11.5

A

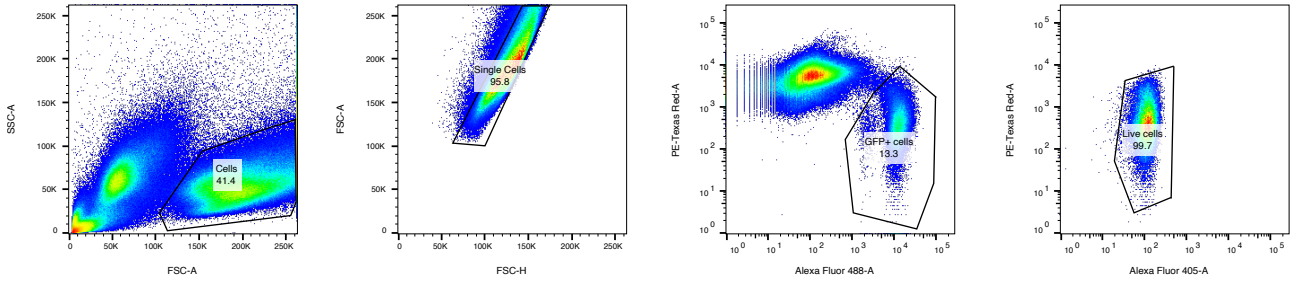

B

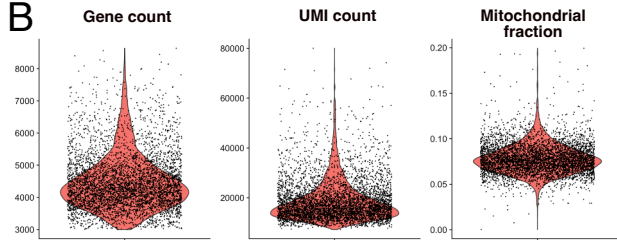

C

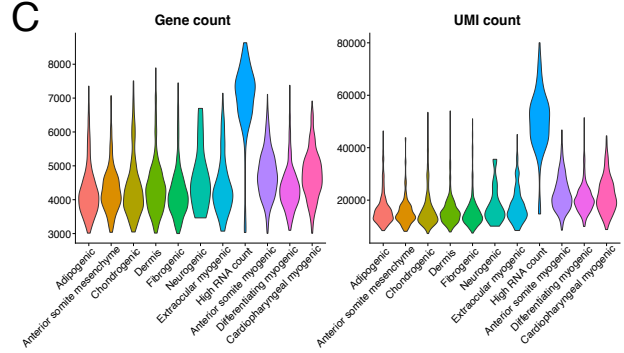

D

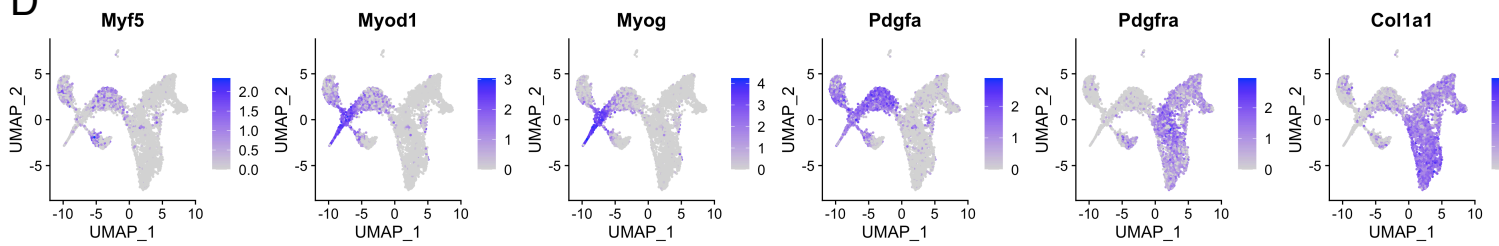

E

Cell cycle phases

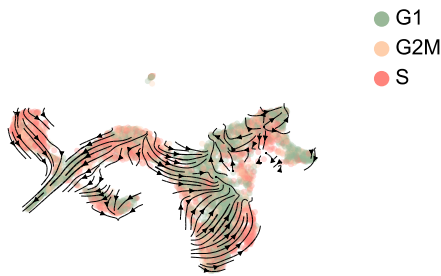

F

scvelo metrics

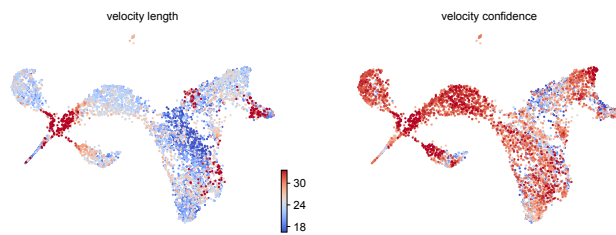

G

spliced unspliced

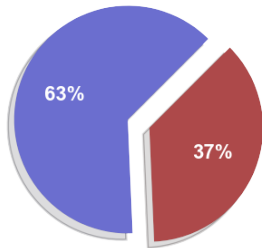

spliced unspliced

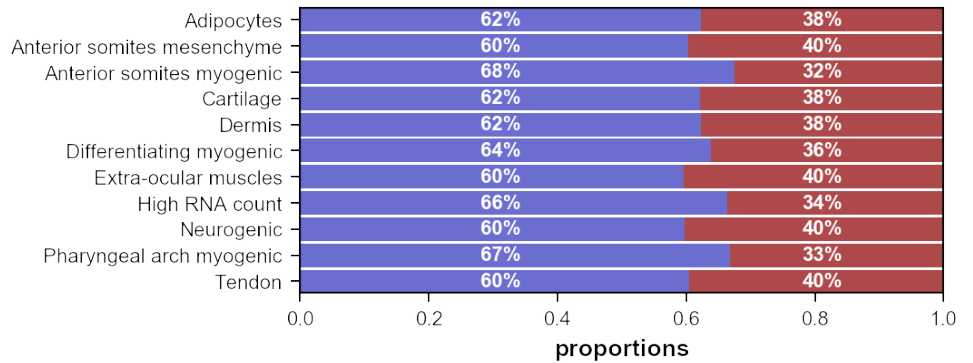

H

|                     | Adipogenic | Anterior somite mesenchyme | Anterior somite myogenic | Cardiopharyngeal myogenic | Chondrogenic | Dermis   | Differentiating myogenic | Extraocular myogenic | Fibrogenic | High RNA count | Neurogenic |
|---------------------|------------|----------------------------|--------------------------|---------------------------|--------------|----------|--------------------------|----------------------|------------|----------------|------------|
| velocity_length     | 21.1348    | 25.1768                    | 23.5569                  | 22.5978                   | 22.6901      | 22.2623  | 29.3827                  | 25.0175              | 20.752     | 24.3863        | 24.623     |
| velocity_confidence | 0.862231   | 0.807534                   | 0.923085                 | 0.904145                  | 0.872298     | 0.847862 | 0.911151                 | 0.893279             | 0.808714   | 0.888532       | 0.864841   |
