# Supplementary material for: Identification of bipotent progenitors that give rise to myogenic and connective tissues in mouse
Source: eLife journal article supplement (doi:10.7554/elife.70235), 2022-02-28
Supplement: supp [file elife_poa_e70235_Figure_6_figure_supplement_1.pdf › elife_poa_e70235_Figure_6_figure_supplement_1.pdf]

A

Myf5<sup>GFP-P/+</sup> E12.5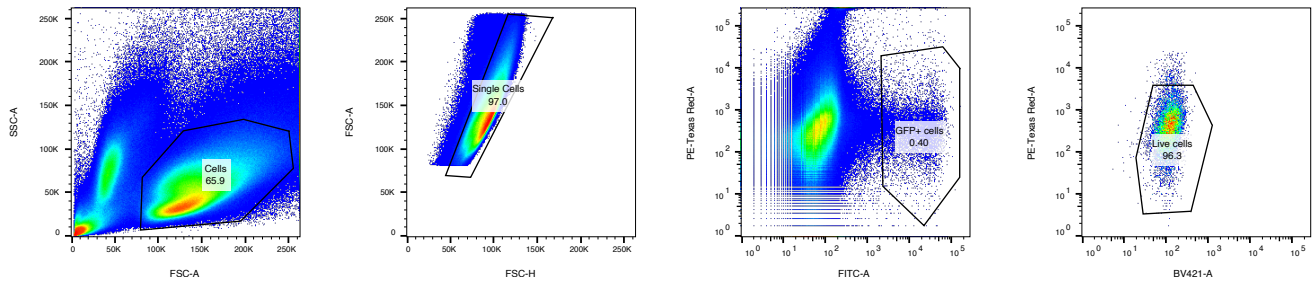

B

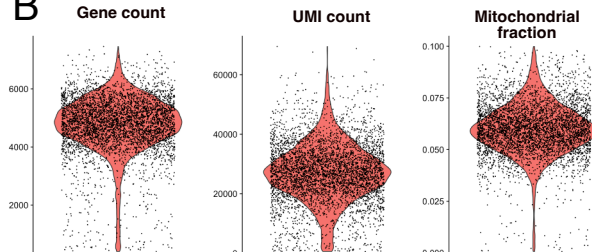

C

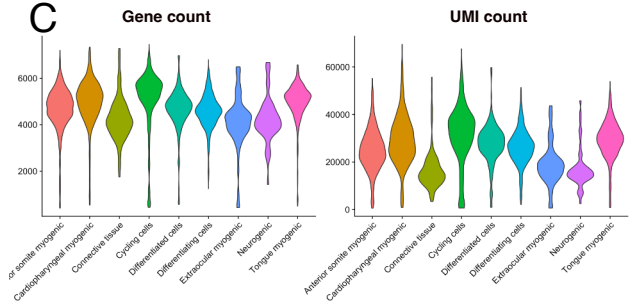

D

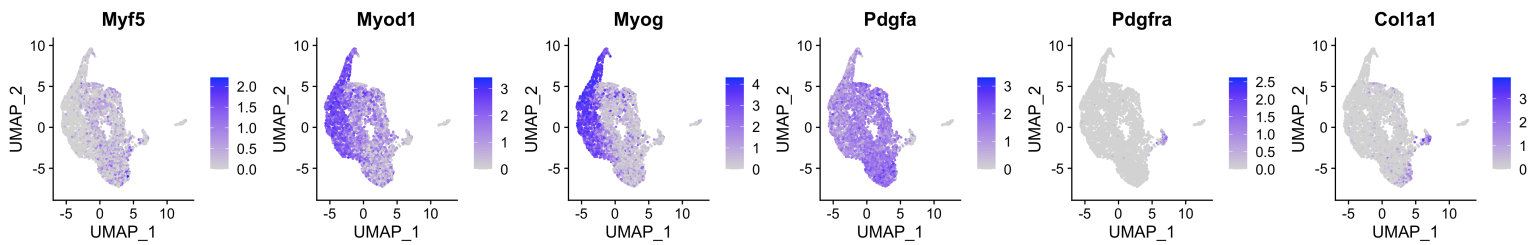

E

Cell cycle phases

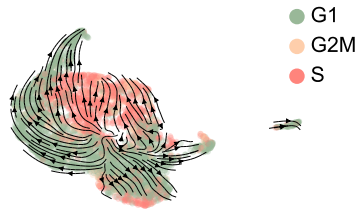

F

scvelo metrics

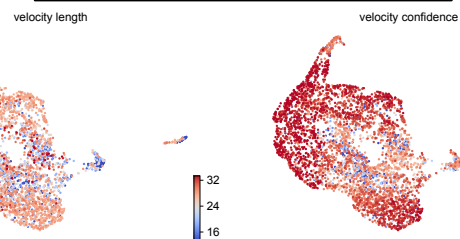

G

■ spliced ■ unspliced

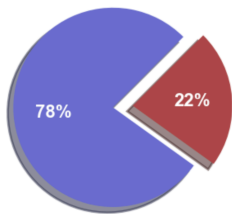

■ spliced ■ unspliced

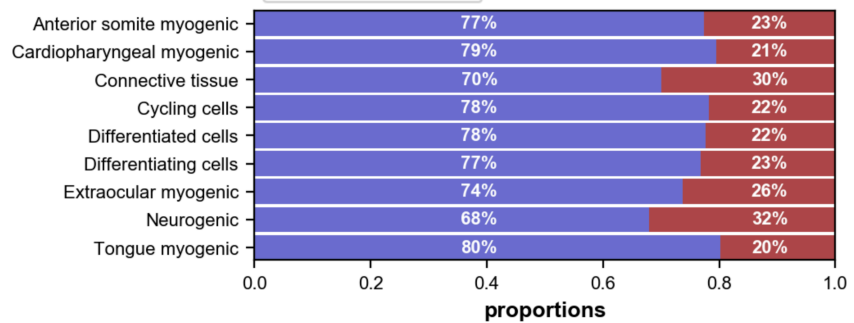

H

|                     | Anterior somite myogenic | Cardiopharyngeal myogenic | Connective tissue | Cycling cells | Differentiated cells | Differentiating cells | Extraocular myogenic | Neurogenic | Tongue myogenic |
|---------------------|--------------------------|---------------------------|-------------------|---------------|----------------------|-----------------------|----------------------|------------|-----------------|
| velocity_length     | 24.866                   | 24.0137                   | 16.4945           | 26.3694       | 22.5581              | 29.0369               | 21.7269              | 14.3981    | 23.6558         |
| velocity_confidence | 0.890012                 | 0.83876                   | 0.807856          | 0.920214      | 0.911377             | 0.92695               | 0.899938             | 0.848084   | 0.774076        |
