# Supplementary material for: Identification of bipotent progenitors that give rise to myogenic and connective tissues in mouse
Source: eLife journal article supplement (doi:10.7554/elife.70235), 2022-02-28
Supplement: supp [file elife_poa_e70235_Figure_6_figure_supplement_2.pdf › elife_poa_e70235_Figure_6_figure_supplement_2.pdf]

Myf5<sup>GFP-P/+</sup> E14.5

A

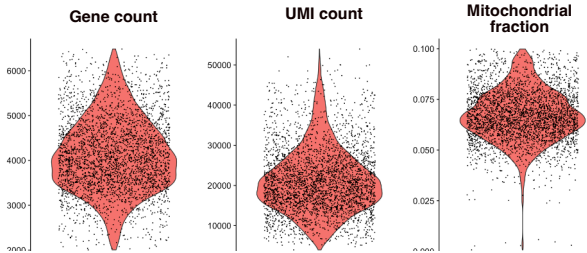

B

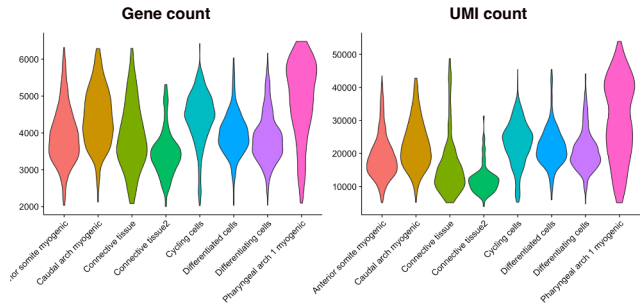

C

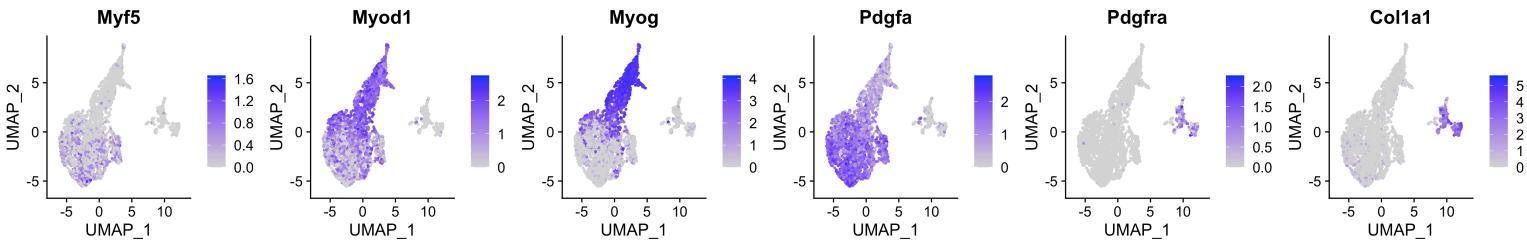

D

Cell cycle phases

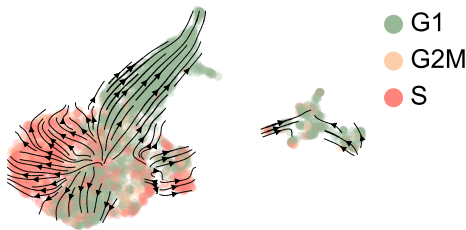

E

scvelo metrics

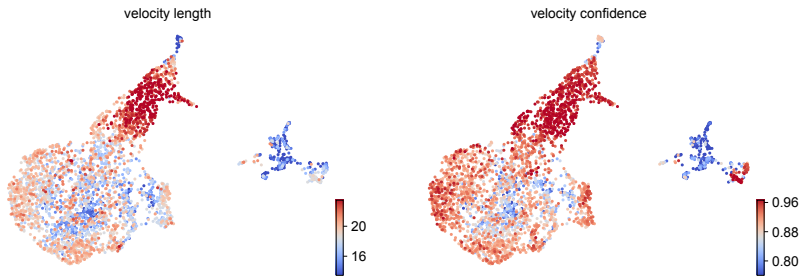

F

spliced, unspliced

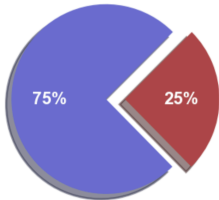

spliced, unspliced

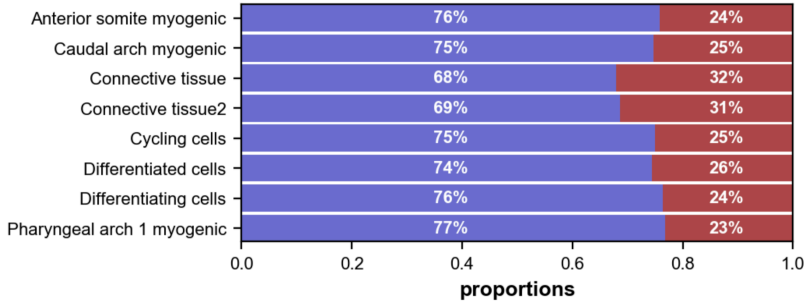

G

|                     | Anterior somite myogenic | Caudal arch myogenic | Connective tissue | Connective tissue2 | Cycling cells | Differentiated cells | Differentiating cells | Pharyngeal arch 1 myogenic |
|---------------------|--------------------------|----------------------|-------------------|--------------------|---------------|----------------------|-----------------------|----------------------------|
| velocity_length     | 17.9123                  | 17.81                | 14.15             | 16.4921            | 18.8776       | 21.4145              | 20.4959               | 17.7144                    |
| velocity_confidence | 0.872016                 | 0.893                | 0.762495          | 0.905872           | 0.907231      | 0.938404             | 0.936807              | 0.864572                   |
