# Supplementary figures and images for: Identification of bipotent progenitors that give rise to myogenic and connective tissues in mouse
Source: eLife journal article supplement (doi:10.7554/elife.70235), 2022-02-28

# Mesp1<sup>Cre/+</sup>;R26<sup>mTmG/+</sup> E10.5

A

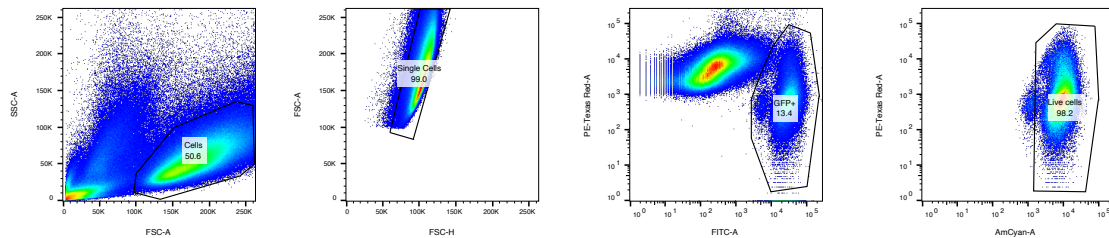

B

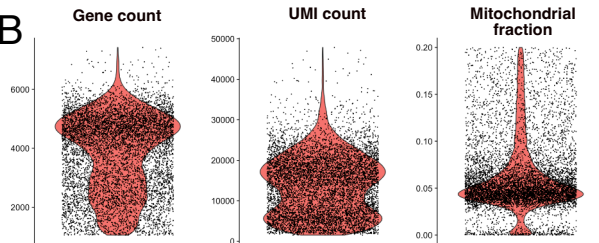

C

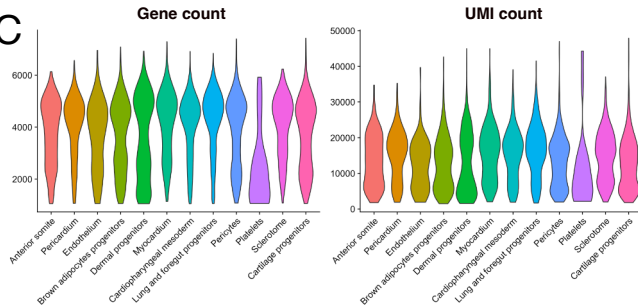

Supplement: supp [file elife_poa_e70235_Figure_1_figure_supplement_1.pdf › elife_poa_e70235_Figure_1_figure_supplement_1.pdf]

**Mesp1<sup>Cre/+</sup>;R26<sup>mTmG/+</sup> E10.5**

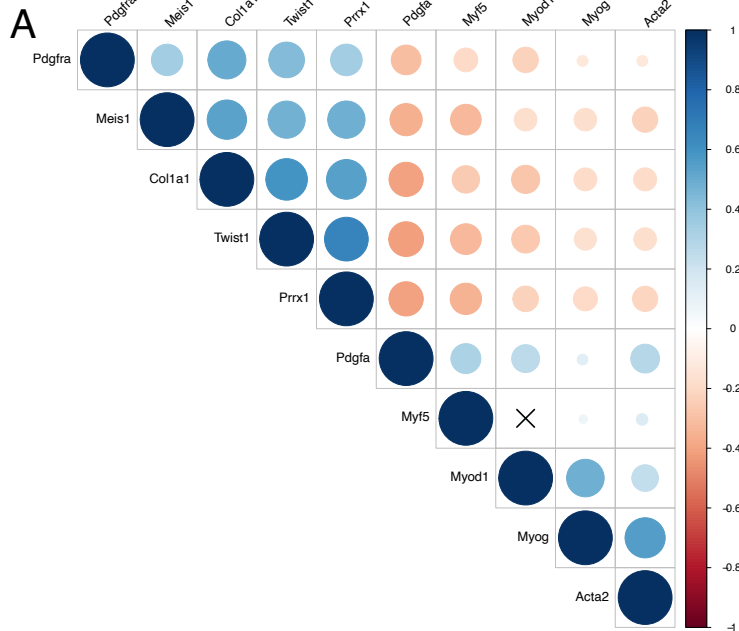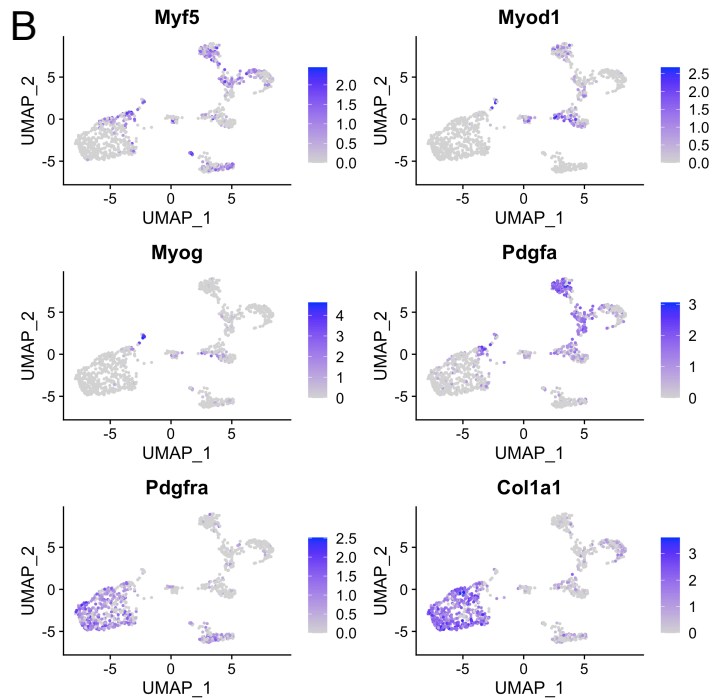

Supplement: supp [file elife_poa_e70235_Figure_1_figure_supplement_3.pdf › elife_poa_e70235_Figure_1_figure_supplement_3.pdf]

Myf5<sup>Cre/+</sup>;R26<sup>mTmG/+</sup>

E11.5

EOM

A

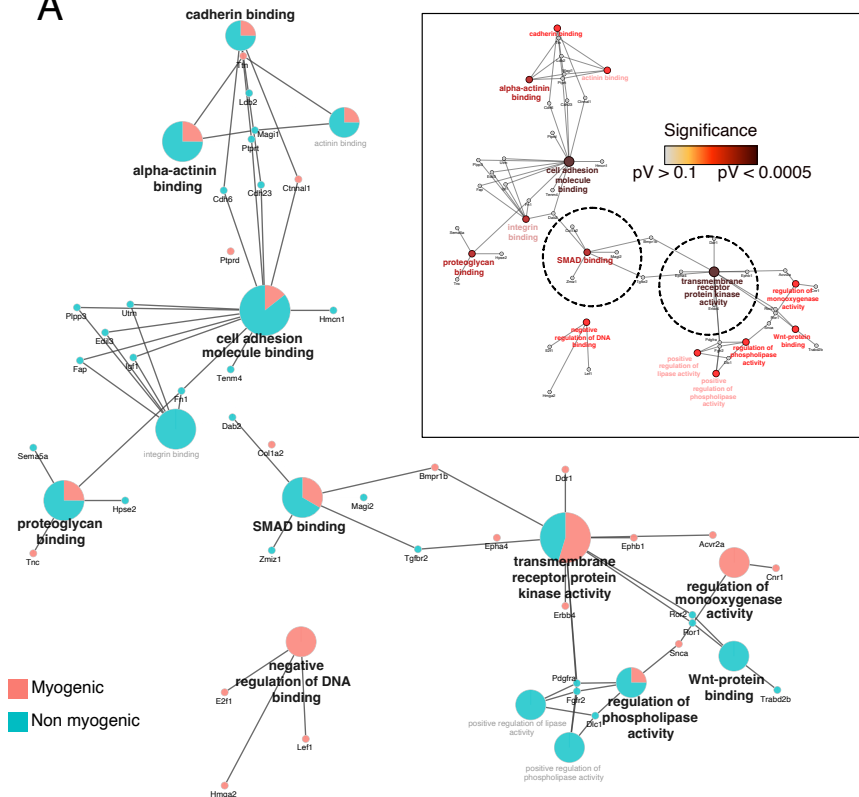

B

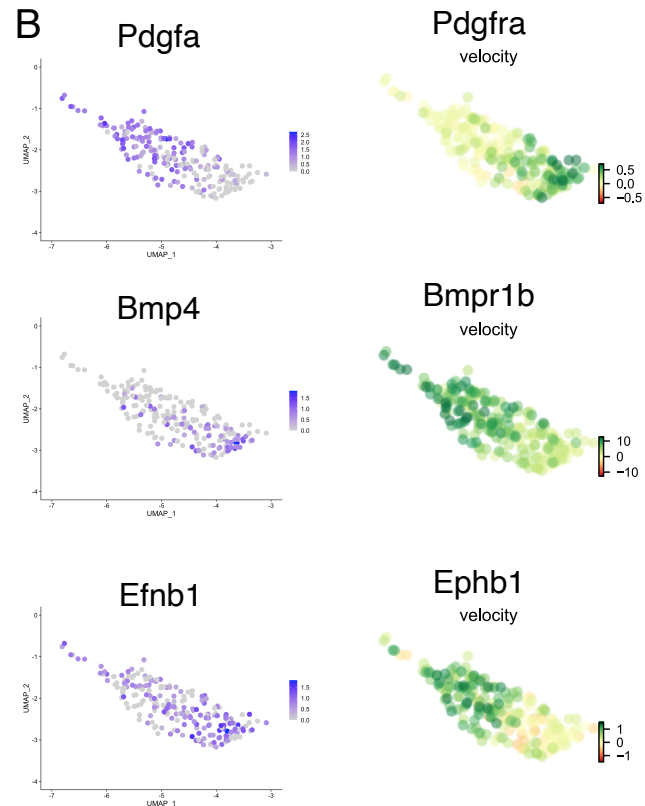

Supplement: supp [file elife_poa_e70235_Figure_4_figure_supplement_2.pdf › elife_poa_e70235_Figure_4_figure_supplement_2.pdf]

Myf5<sup>Cre/+</sup>;R26<sup>mTmG/+</sup> E11.5 EOM

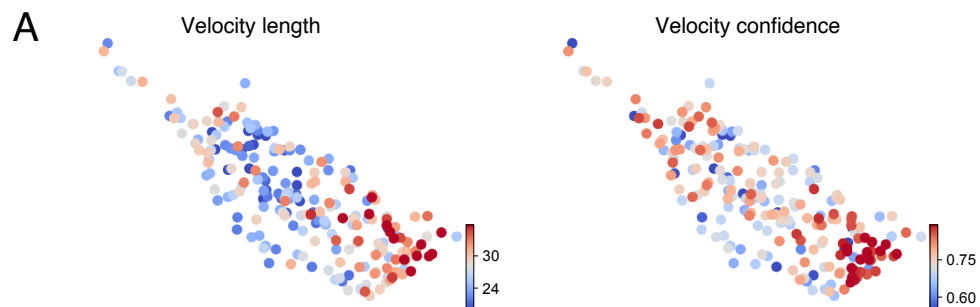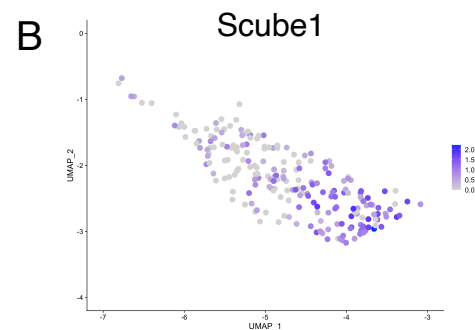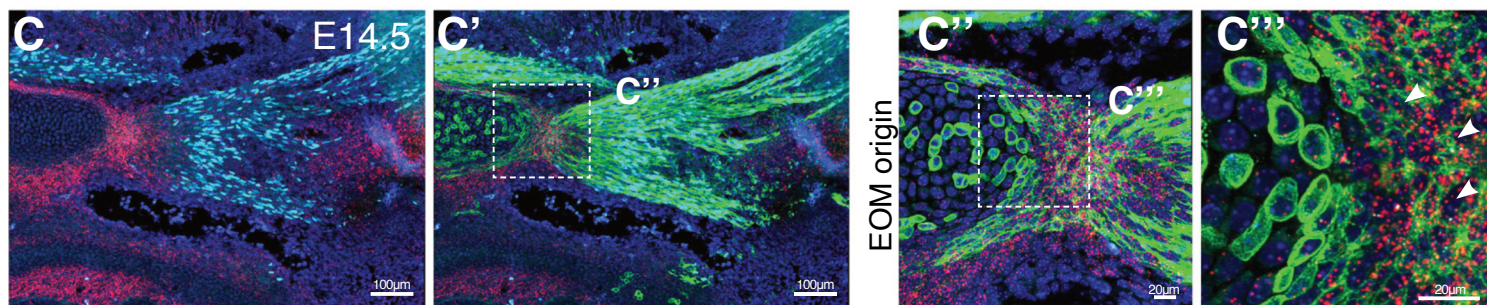

Scube1 MYOD/MYOG mGFP Hoechst

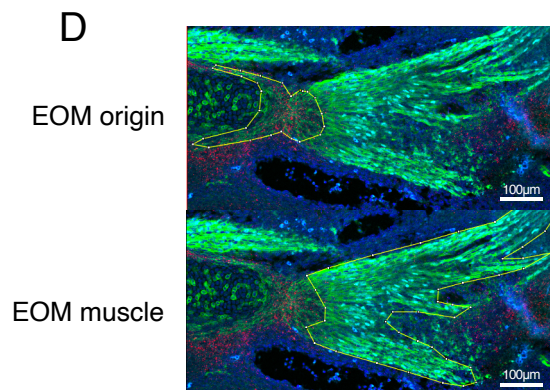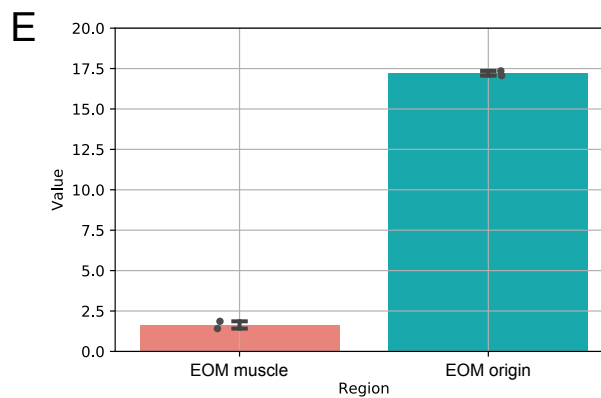

Supplement: supp [file elife_poa_e70235_Figure_5_figure_supplement_1.pdf › elife_poa_e70235_Figure_5_figure_supplement_1.pdf]

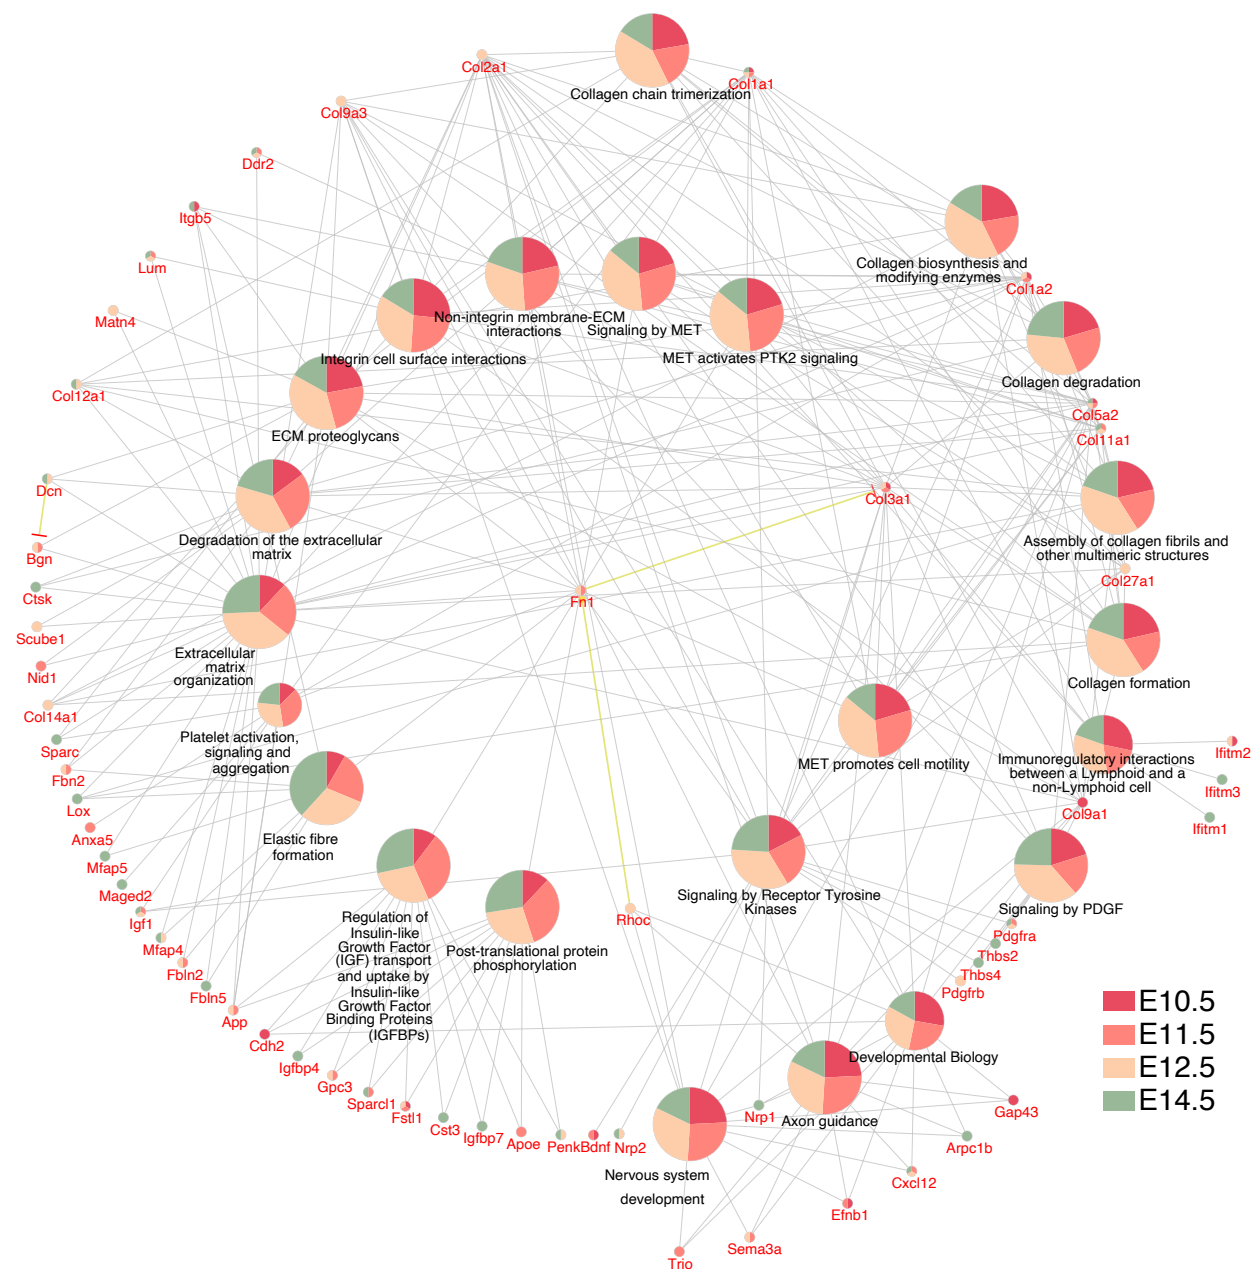

Supplement: supp [file elife_poa_e70235_Figure_6_figure_supplement_3.pdf › elife_poa_e70235_Figure_6_figure_supplement_3.pdf]

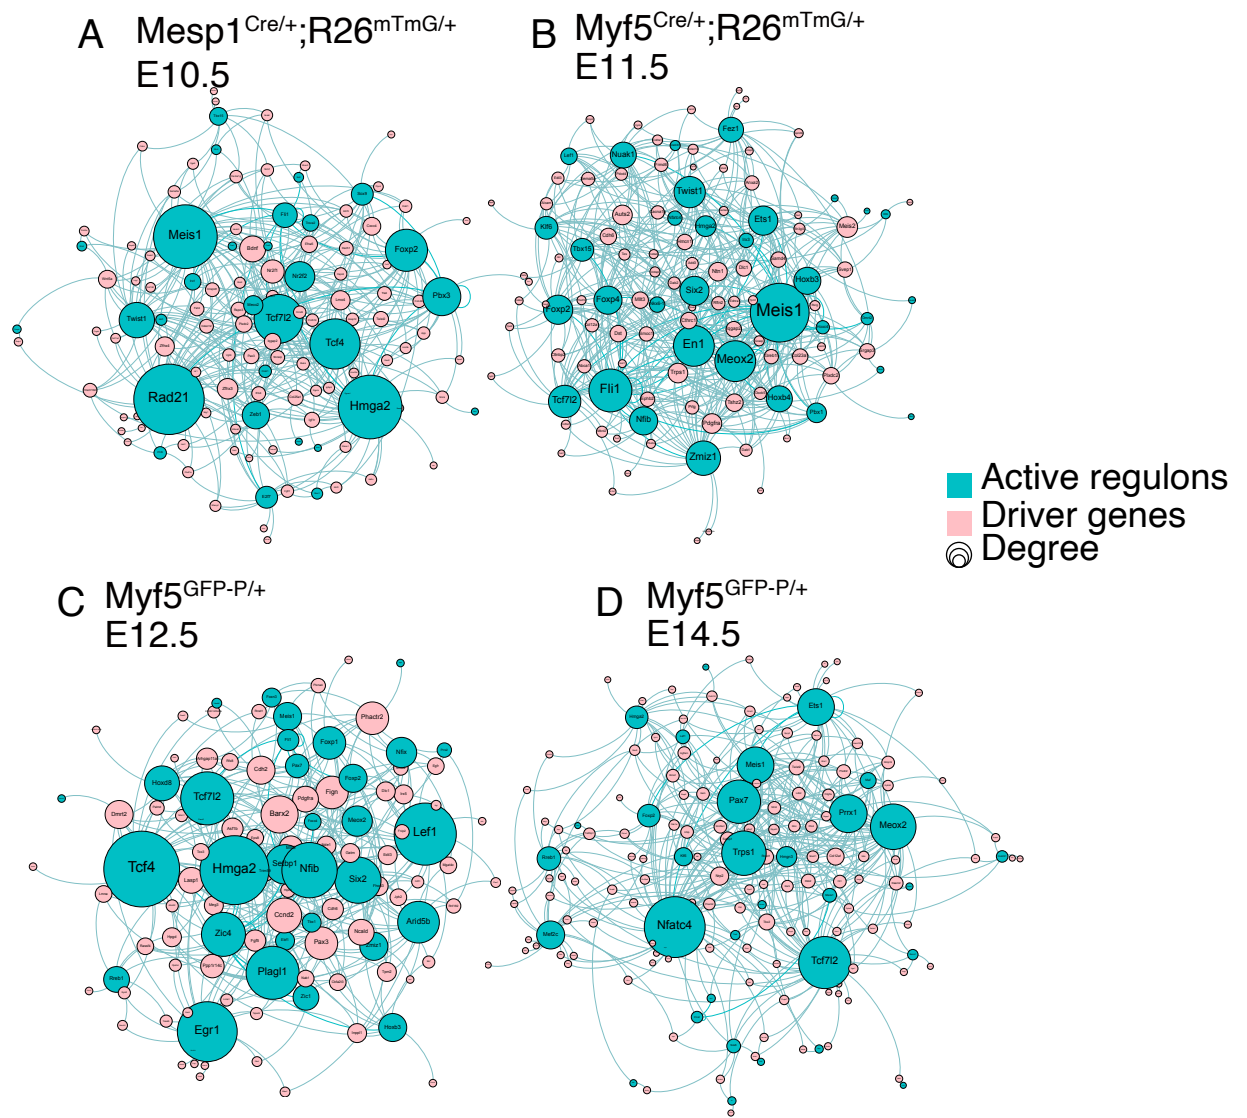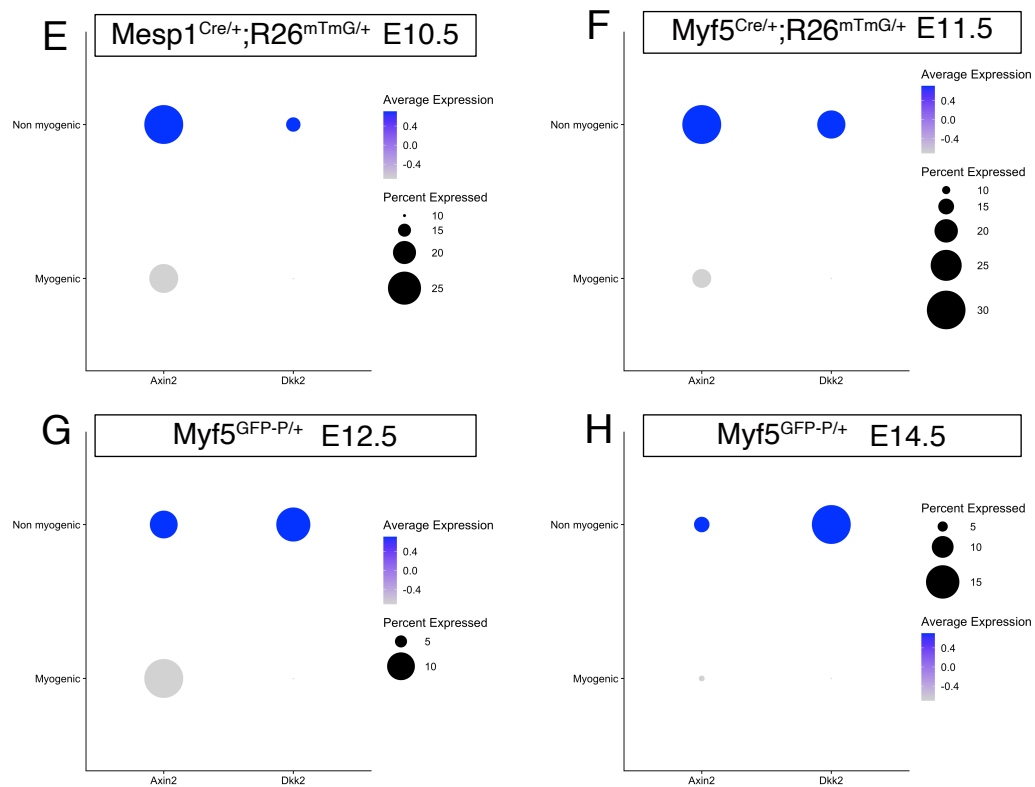

Supplement: supp [file elife_poa_e70235_Figure_7_figure_supplement_1.pdf › elife_poa_e70235_Figure_7_figure_supplement_1.pdf]

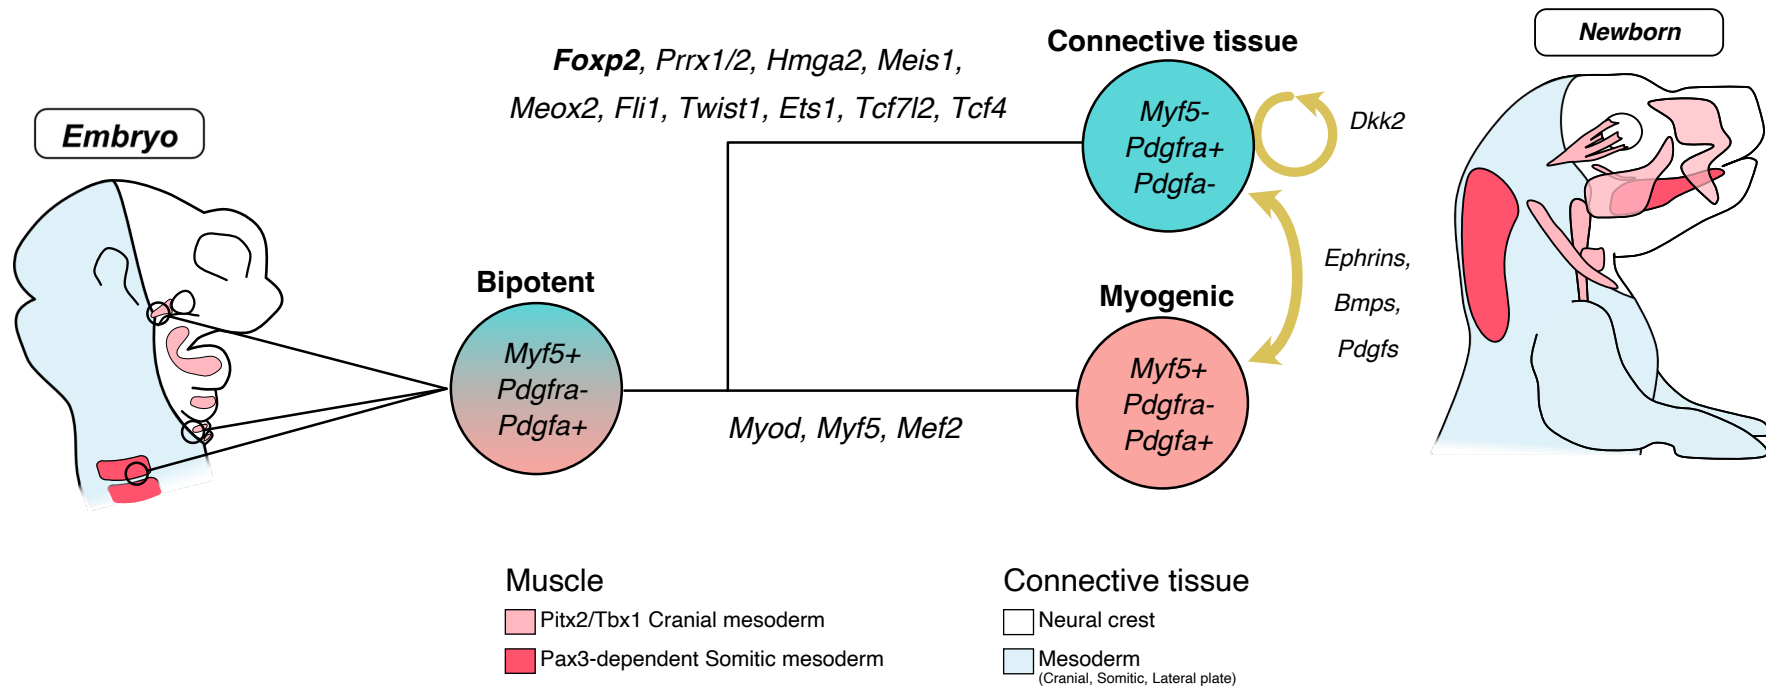

Supplement: supp [file elife_poa_e70235_Figure_7_figure_supplement_2.pdf › elife_poa_e70235_Figure_7_figure_supplement_2.pdf]
